# Supplementary material for: Glutaryl-CoA Dehydrogenase Misfolding in Glutaric Acidemia Type 1
Source: MDPI journal article supplement (doi:10.3390/ijms241713158), 2023-08-24
Supplement: s1 [file Supplementary_Tables_20230731.xlsx]

## Sheet: TableS1
		Table S1. GCDH mutations and associated frequency and activities.
		Mutation	Accession Number	Allele frequency (%)	Cellular activity in homozygosity (% of WT)	Recombinant GCDH Activity (% of WT)
		F71S	CM002256
		R88C	CM960708	4[1], 6[2]	0[1,6]	0[7,8]
		R138G	CM980854
		G178R	CM960710	5[2]		0[8]
		E181K	CM002261		0[1,4]
		R227P	CM960711	5[1], 3[2]	8[1]	0.2[8], 11[7]
		M263V	CM033378		30[1]
		V400M	CM960718	10[1], 6[2]	5-15[1,4,5]	0.8 [8]
		R402W	CM960719	20[1], 9[2], 12-17[3,4,5]	0[1,4,5,6]	3[8]
		E414K	CM960720	2[2]
		A421V	CM960722	5[2]	0[1,5]	6[7],20-40[2,8], 49*[9]
		A433E	CM980890			<0.6*[9]
		A433V	CM002266			56%*[9]
		Allele frequency within patient populations, with respective GCDH residual activity in homozygosity from patient fibroblasts or leukocytes, and recombinant enzymatic activity (*in crude extracts)
	References
	1.	Christensen, E.; Ribes, A.; Merinero, B.; Zschocke, J. Correlation of Genotype and Phenotype in Glutaryl-CoA Dehydrogenase Deficiency. J Inherit Metab Dis 2004, 27, 861–868, doi:10.1023/B:BOLI.0000045770.93429.3c.
	2.	Biery, B.J.; Stein, D.E.; Morton, D.H.; Goodman, S.I. Gene Structure and Mutations of Glutaryl-Coenzyme A Dehydrogenase: Impaired Association of Enzyme Subunits That Is Due to an A421V Substitution Causes Glutaric Acidemia Type I in the Amish. Am J Hum Genet 1996, 59, 1006–1011.
	3.	TP, K.-V.; Muntaj, S.; Devaraju, K.; Kamate, M.; Vedamurthy, A. Genetic Screening of Selected Disease-Causing Mutations in Glutaryl-CoA Dehydrogenase Gene among Indian Patients with Glutaric Aciduria Type I. J Pediatr Genet 2017, 06, 142–148, doi:10.1055/s-0037-1599202.
	4.	Eldeeb, M.A.; Ragheb, M.A. N -Degron-Mediated Degradation and Regulation of Mitochondrial PINK1 Kinase. Curr Genet 2020, 66, 693–701.
	5.	Kölker, S.; Garbade, S.F.; Greenberg, C.R.; Leonard, J. V.; Saudubray, J.M.; Ribes, A.; Kalkanoglu, H.S.; Lund, A.M.; Merinero, B.; Wajner, M.; et al. Natural History, Outcome, and Treatment Efficacy in Children and Adults with Glutaryl-CoA Dehydrogenase Deficiency. Pediatr Res 2006, 59, 840–847, doi:10.1203/01.pdr.0000219387.79887.86.
	6.	Schwartz, M.; Christensen, E.; Superti-Furga, A.; Brandt, N.J. The Human Glutaryl-CoA Dehydrogenase Gene: Report of Intronic Sequeuces and of 13 Novel Mutations Causing Glutaric Aciduria Type I. Hum Genet 1998, 102, 452–458, doi:10.1007/s004390050720.
	7.	Liesert, M.; Zschocke, J.; Hoffmann, G.F.; Mühlhäuser, N.; Buckel, W. Biochemistry of Glutaric Aciduria Type I: Activities of in Vitro Expressed Wild-Type and Mutant CDNA Encoding Human Glutaryl-CoA Dehydrogenase. In Proceedings of the Journal of Inherited Metabolic Disease; Springer, 1999; Vol. 22, pp. 256–258.
	8.	Goodman, S.I.; Stein, D.E.; Schlesinger, S.; Christensen, E.; Schwartz, M.; Greenberg, C.R.; Elpeleg, O.N. Glutaryl-CoA Dehydrogenase Mutations in Glutaric Acidemia (Type I): Review and Report of Thirty Novel Mutations. Hum Mutat 1998, 12, 141–144.
	9.	Westover, J.B.; Goodman, S.I.; Frerman, F.E. Pathogenic Mutations in the Carboxyl-Terminal Domain of Glutaryl-CoA Dehydrogenase: Effects on Catalytic Activity and the Stability of the Tetramer. Mol Genet Metab 2003, 79, 245–256, doi:10.1016/S1096-7192(03)00109-4.

## Sheet: TableS2
	Table S2. Correlation matrix of p-values obtained by pairwise comparison of GCDH variant molecular phenotypes
		Protein amount (Cells)	Tetramerization (Cells)	Tetramerization (rGCDH)	Solubility (28)	Solubility (20)	Aggregation	RALS Tm1	RALS Tm2	Hydrophobicity	Thermal Stability (Tm1)	Thermal Stability (Tm2)	Cellular activity	Recomb. Activity	Sequence Location
	Tetramerization (Cells)	0.647437
	Tetramerization (rGCDH)	0.806587	0.0204078
	Solubility (28)	0.104147	0.02275	0.160194
	Solubility (20)	0.248658	0.230091	0.553435	0.762553
	Aggregation	0.156795	0.0692341	0.176556	0.291154	0.581731
	RALS (Tm1/2)	0.680548	0.203644	0.0745833	0.909384	0.105999	0.393704
	RALS (Tm2/3)	0.799065	0.976511	0.224801	0.371664	0.255979	0.0751536	0.131741
	Hydrophobicity	0.236267	0.667979	0.571738	0.630209	0.756535	0.31968	0.112219	0.194026
	Thermal Stability (Tm1/2)	0.637508	0.307324	0.134817	0.731041	0.209241	0.159146	0.179923	0.265626	0.285315
	Thermal Stability (Tm2/3)	0.0128533	0.284857	0.254795	0.0821282	0.247379	0.44267	0.892523	0.722954	0.409644	0.311795
	Cellular activity	0.480798	0.971438	0.0924815	0.881022	0.0963053	0.403518	0.143487	0.215152	0.324419	0.00477716	0.596577
	Recombinant Activity	0.796667	0.977573	0.0163335	0.980443	0.320715	0.48133	0.168062	0.280073	0.29238	0.00807793	0.923239	3.14402e-05
	Sequence Location	0.0519067	0.653881	0.128352	0.886533	0.508804	0.363523	0.0712666	0.150483	0.387738	0.757022	0.463663	0.289431	0.595556
	Domain location	0.112984	0.727873	0.149611	0.945481	0.239777	0.480186	0.0824806	0.116117	0.390788	0.817179	0.462955	0.286864	0.527543	4.16144e-08
		Molecular phenotypic correlations were estimated as Pearson correlations between each pair of traits for the different GCDH variants studied (using GraphPad Prism).
